# Supplementary material
Source: PubMed Central journal article supplement (PMC3339977)

Supplemental Figure 1

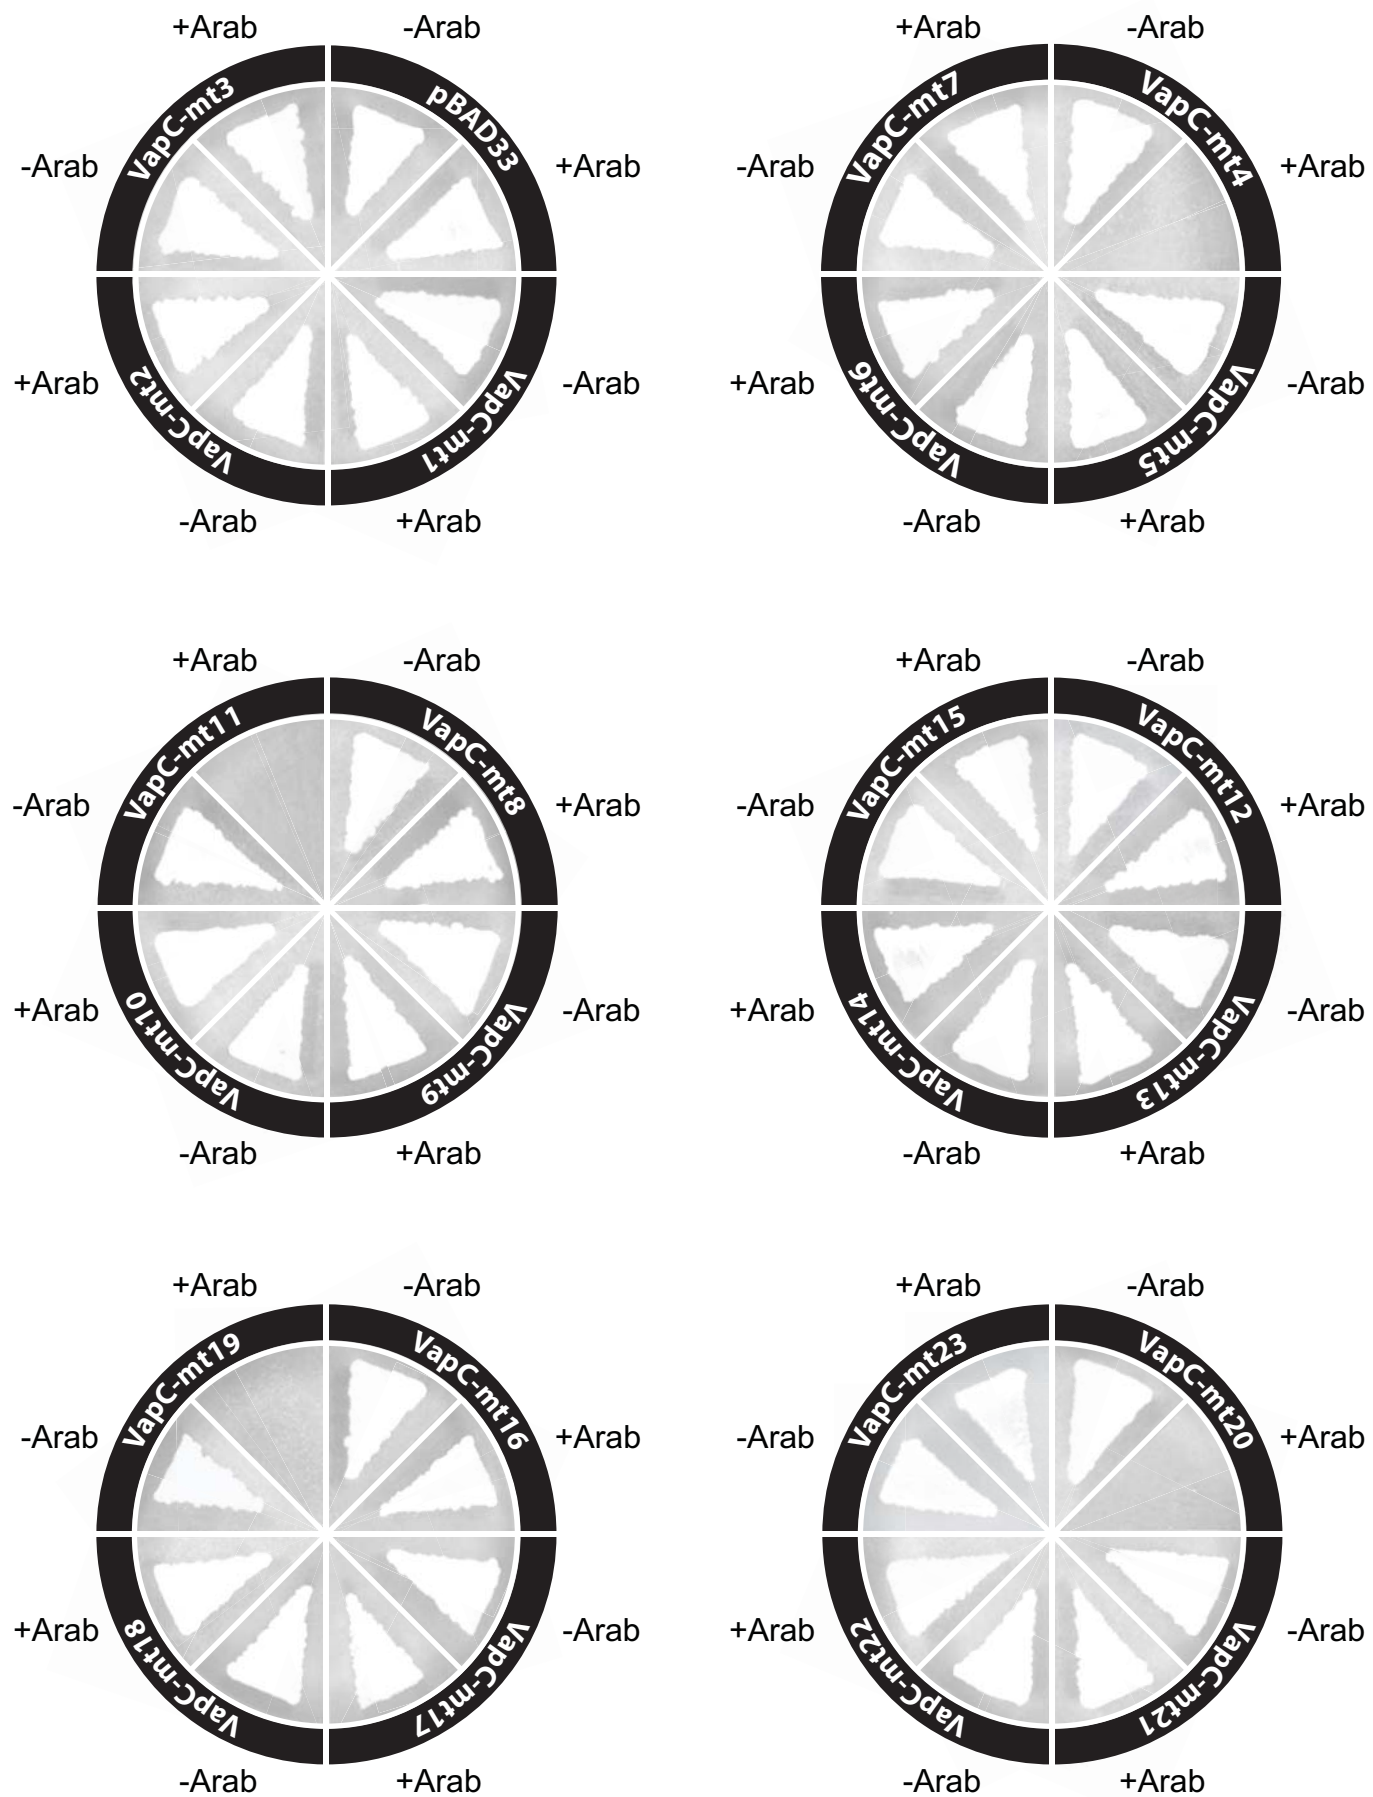

# Supplemental Figure 2

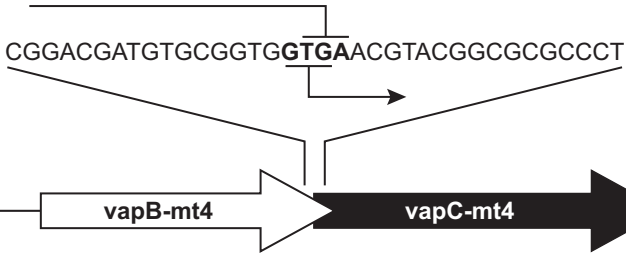

# Supplemental Figure 3

**A**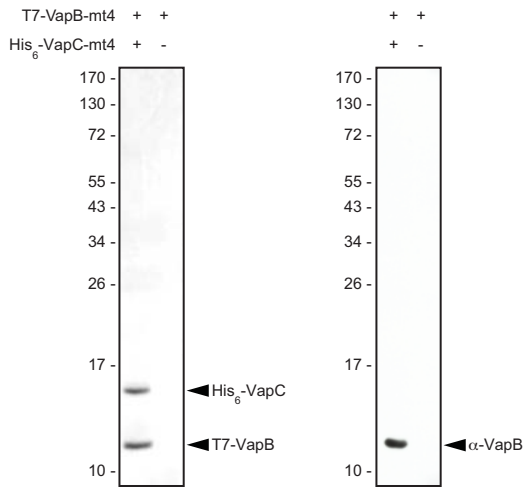**B**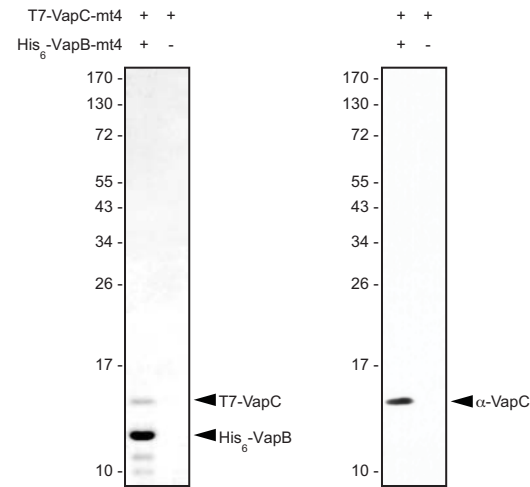

Supplemental Figure 4

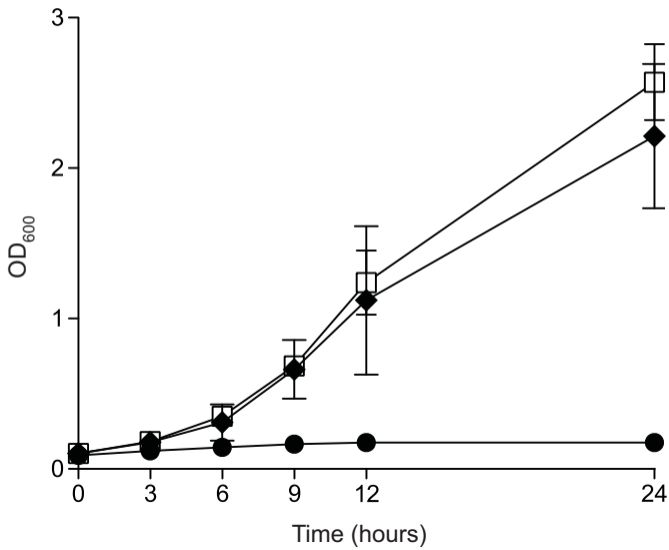

Supplemental Figure 5

**A**

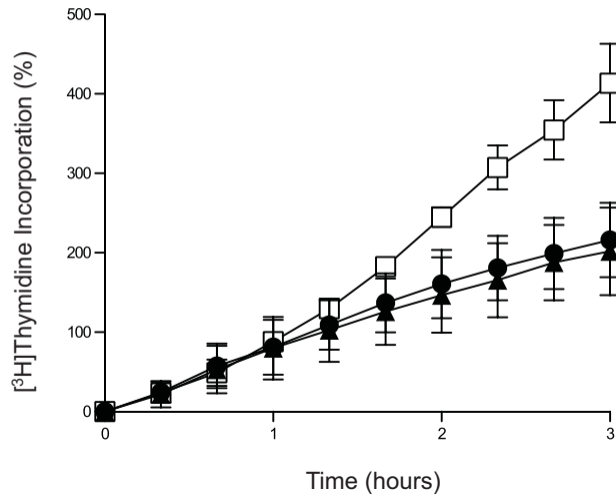

**B**

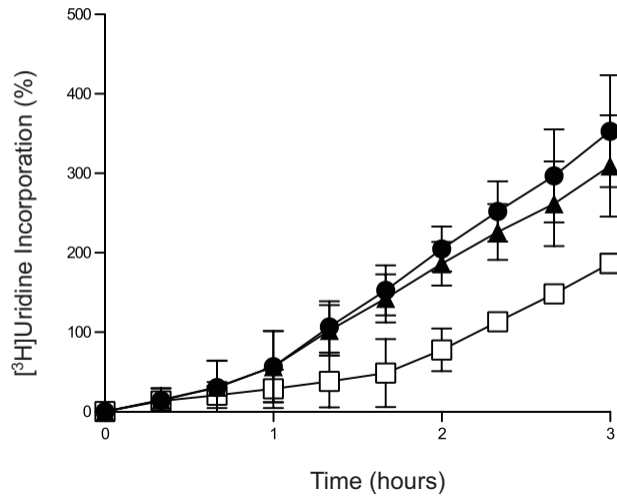

# Supplemental Figure 6

**A**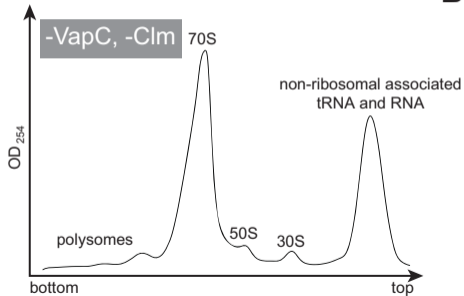**B**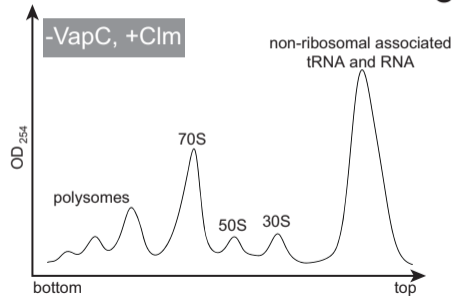**C**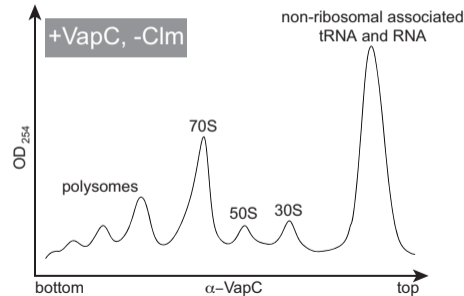

# Supplemental Figure 7

**A**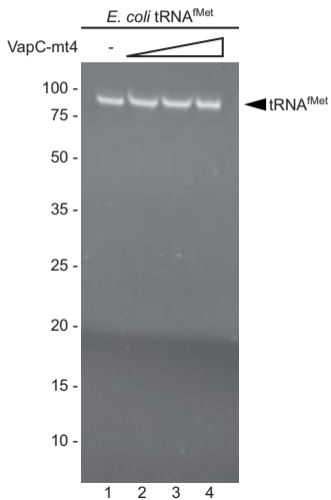**B**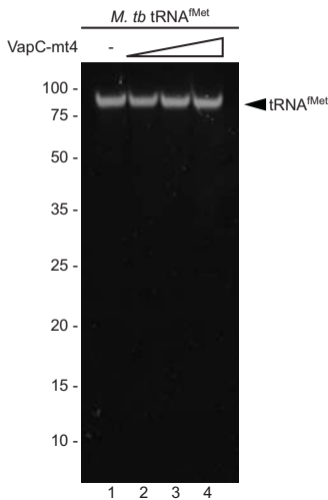

# Supplemental Figure 8

## A

|          |                                                                                               |
|----------|-----------------------------------------------------------------------------------------------|
| VapC-mt4 | RALADTSVFIGIEATRFDP-----DRFAGYEWGVSVVTLGELRLGVL (49) INDSWIAATAVAH-GIAILFIQNDYA 5-116         |
| PAE2754  | EYLVDASALYAL-AAHYDK-WIKH-----REKLAILHLTIYEAGNALW (45) FYDASYAYVAES-SGLVLVFIQDRELL 4-114       |
| AF0591   | CAVVDTNVLMYVYLNKAD--VVGQLREFGFSRFLITASVKRELEKLEM (27) EGDPSLIEAAEK-YGCILIFMDKELK 13-110       |
| FitB     | MILLDTNVISEPLRPQPNERVVAWLDSLILEDEVYLSAITVAELRLGVA (53) AADGYIAATAKQH-SLTVAFIRDTGSF 1-122      |
| SMG-5    | YVLMQYDVIVDKIRIALKIWDI----DDFICILPSTVLDELQYQKTKN (41) AEDHKHIVAF (8) KEMEGVTFYIDIDQF 427-543  |
| NMD4p    | NFIIDASAFEKGLGNIKRWCSDCTEAVTLNFYIPTFTLNELDFLQRR (57) KRLKNLLKSC (13) HWFLIIS-EDPQIR 5-143     |
| anon34Ea | FVVVDSKALTEYNGIVKSLVR----TKKCIVLIPNAVLNELDLKKRS (39) KMDRDASVFL (24) VVTYLS-GDNLHE 1013-1141  |
| PolI     | LFVIDASGFIFRAYFALPEMK (17) NKLIKEFSPEYMISVFDGPNKQ (46) EADDVIASIA (9) YKVYVCF-ADKDLL 4-138    |
| RNase H  | ICLIDFSQIALSTALVNFPDK (19) VKKAKTLGYTKIVLCIDNAKSGY (52) EADDHIAVLV (7) HKILIIIS-SDGDFT 15-159 |
| FENI     | KVAIDGMNALYQFLTISRRLD (20) KTIHLLENDITPIWVFDGPEPKL (65) EGEAQASYMAKKGDVWAVVSIQDYDAL 23-177    |

## B

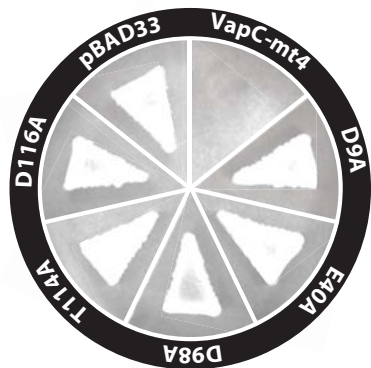

## C

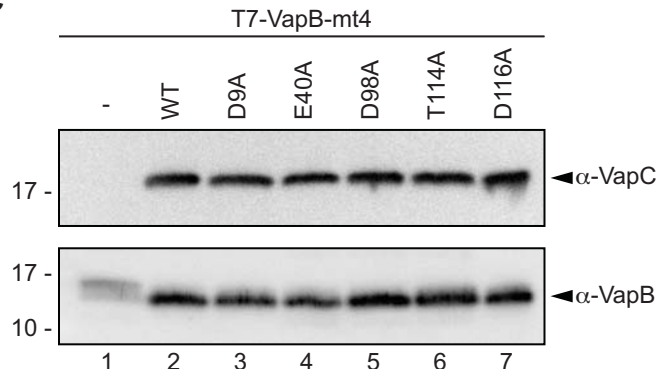



# Supplemental Figure 9

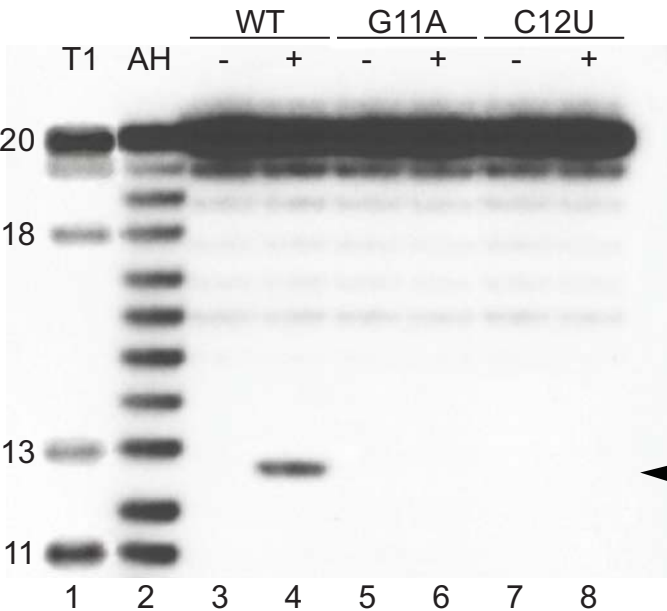

5' AGGAAGAU**ACGCG**GAUAUGAA 3'

2 3          6          11 13          18

# Supplemental Figure 10

**A**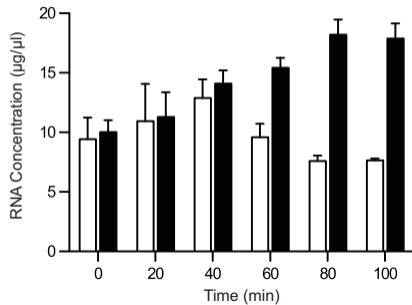**B**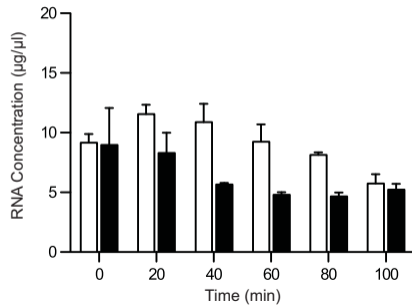

Supplement: supp_M112.340109_Supplemental_Figures.pdf [file supp_M112.340109_Supplemental_Figures.pdf]
